# Supplementary material
Source: PubMed Central journal article supplement (PMC3123101)
Supplement: supp_M110.214361_jbc.M110.214361-2.pdf [file supp_M110.214361_jbc.M110.214361-2.pdf]

**A**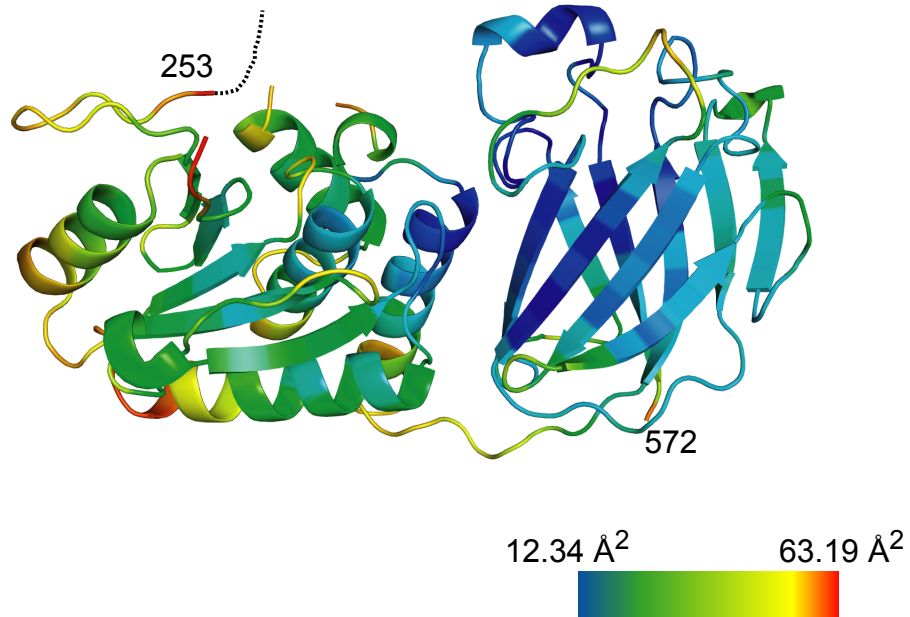**B**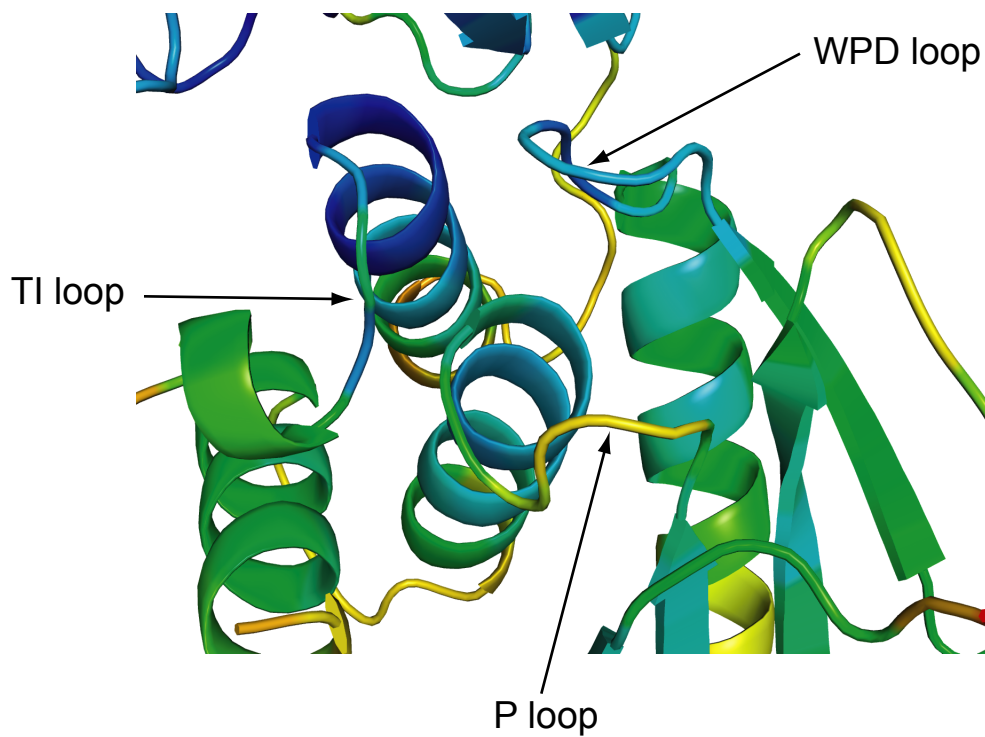

**Supplemental Figure S1** The B-factor distribution of the cytoplasmic region of Ci-VSP. (A) The B-factor distribution in the overall Ci-VSP cytoplasmic region is represented in rainbow colors. The higher B-factor of the residue is shown in red color, and the lower B-factor in blue. The maximum B-factor of the residue is 63.19 Å<sup>2</sup>, and the minimum is 12.34 Å<sup>2</sup>. (B) Close-up view of Ci-VSP active site.
