# Supplementary material
Source: PubMed Central journal article supplement (PMC3123101)
Supplement: supp_M110.214361_jbc.M110.214361-3.pdf [file supp_M110.214361_jbc.M110.214361-3.pdf]

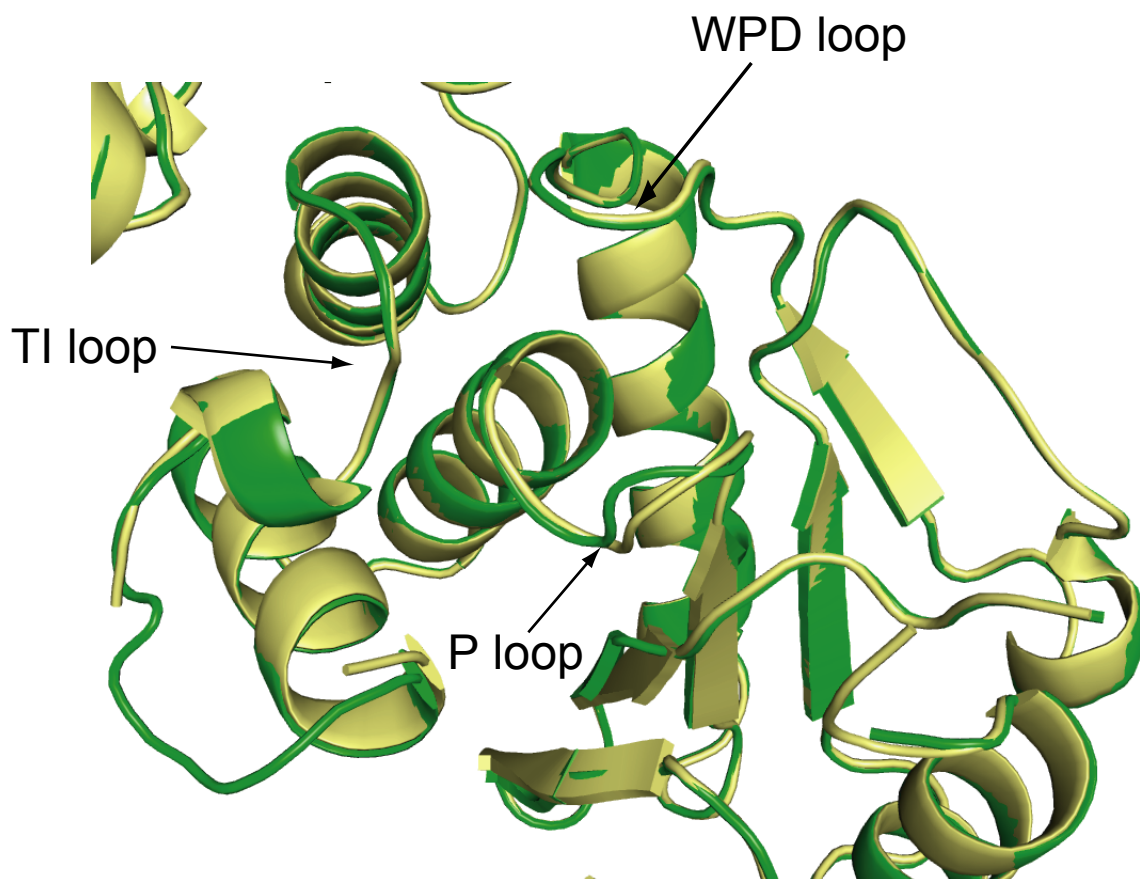

**Supplemental Figure S2** The superimposition of the structure of WT-236 and G365A-248 around at the active site. The structure of WT-236 is shown in yellow and that of G365A-248 in green. The r.m.s.deviation of  $C^{\alpha}$ - $C^{\alpha}$  between WT-236 and G365A-248 is 0.32 Å.
